# Supplementary material
Source: PubMed Central journal article supplement (PMC5159264)
Supplement: NIHMS821127-supplement-Supp_Table_S1.pdf [file NIHMS821127-supplement-Supp_Table_S1.pdf]

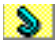

| Table of Onclarity by LA for HPV 16 |              |      |      |       |
|-------------------------------------|--------------|------|------|-------|
|                                     | Linear Array |      |      |       |
| Onclarity                           | POS          | NEG  | .    | Total |
| POS                                 | 600          | 23   | 1646 | 623   |
| NEG                                 | 40           | 1885 | 6651 | 1925  |
| .                                   | 13           | 36   | 200  | .     |
| <b>Total</b>                        | 640          | 1908 | .    | 2548  |
| <b>Frequency Missing = 8546</b>     |              |      |      |       |

| Table of Onclarity by LA for HPV 18 |              |      |      |       |
|-------------------------------------|--------------|------|------|-------|
|                                     | Linear Array |      |      |       |
| Onclarity                           | POS          | NEG  | .    | Total |
| POS                                 | 173          | 14   | 507  | 187   |
| NEG                                 | 23           | 2338 | 7790 | 2361  |
| .                                   | 5            | 44   | 200  | .     |
| <b>Total</b>                        | 196          | 2352 | .    | 2548  |
| <b>Frequency Missing = 8546</b>     |              |      |      |       |

| Table of Onclarity by LA for HPV 31 |              |      |      |       |
|-------------------------------------|--------------|------|------|-------|
|                                     | Linear Array |      |      |       |
| Onclarity                           | POS          | NEG  | .    | Total |
| POS                                 | 283          | 38   | 879  | 321   |
| NEG                                 | 21           | 2206 | 7418 | 2227  |
| .                                   | 7            | 42   | 200  | .     |
| <b>Total</b>                        | 304          | 2244 | .    | 2548  |
| <b>Frequency Missing = 8546</b>     |              |      |      |       |

| Table of Onclarity by LA for HPV 45 |              |      |      |       |
|-------------------------------------|--------------|------|------|-------|
|                                     | Linear Array |      |      |       |
| Onclarity                           | POS          | NEG  | .    | Total |
| POS                                 | 116          | 7    | 373  | 123   |
| NEG                                 | 28           | 2397 | 7924 | 2425  |
| .                                   | 3            | 46   | 200  | .     |
| <b>Total</b>                        | 144          | 2404 | .    | 2548  |
| <b>Frequency Missing = 8546</b>     |              |      |      |       |

| Table of Onclarity by LA for HPV 52 |              |  |  |  |
|-------------------------------------|--------------|--|--|--|
|                                     | Linear Array |  |  |  |

| Onclarity                       | POS | NEG  | .    | Total |
|---------------------------------|-----|------|------|-------|
| POS                             | 303 | 48   | 1029 | 351   |
| NEG                             | 38  | 2159 | 7268 | 2197  |
| .                               | 3   | 46   | 200  | .     |
| <b>Total</b>                    | 341 | 2207 | .    | 2548  |
| <b>Frequency Missing = 8546</b> |     |      |      |       |

| Table of Onclarity by LA for HPV 51 |              |      |      |       |
|-------------------------------------|--------------|------|------|-------|
|                                     | Linear Array |      |      |       |
| Onclarity                           | POS          | NEG  | .    | Total |
| POS                                 | 186          | 17   | 733  | 203   |
| NEG                                 | 28           | 2317 | 7564 | 2345  |
| .                                   | 4            | 45   | 200  | .     |
| <b>Total</b>                        | 214          | 2334 | .    | 2548  |
| <b>Frequency Missing = 8546</b>     |              |      |      |       |

| Table of Onclarity by LA for HPV 3358 |              |      |      |       |
|---------------------------------------|--------------|------|------|-------|
|                                       | Linear Array |      |      |       |
| Onclarity                             | POS          | NEG  | .    | Total |
| POS                                   | 210          | 18   | 730  | 228   |
| NEG                                   | 21           | 2299 | 7567 | 2320  |
| .                                     | 1            | 48   | 200  | .     |
| <b>Total</b>                          | 231          | 2317 | .    | 2548  |
| <b>Frequency Missing = 8546</b>       |              |      |      |       |

| Table of Onclarity by LA for HPV 396835 |              |      |      |       |
|-----------------------------------------|--------------|------|------|-------|
|                                         | Linear Array |      |      |       |
| Onclarity                               | POS          | NEG  | .    | Total |
| POS                                     | 365          | 101  | 1560 | 466   |
| NEG                                     | 63           | 2019 | 6737 | 2082  |
| .                                       | 9            | 40   | 200  | .     |
| <b>Total</b>                            | 428          | 2120 | .    | 2548  |
| <b>Frequency Missing = 8546</b>         |              |      |      |       |

| Table of Onclarity by LA for HPV 595666 |              |      |      |       |
|-----------------------------------------|--------------|------|------|-------|
|                                         | Linear Array |      |      |       |
| Onclarity                               | POS          | NEG  | .    | Total |
| POS                                     | 375          | 52   | 1615 | 427   |
| NEG                                     | 57           | 2064 | 6682 | 2121  |
| .                                       | 8            | 41   | 200  | .     |

|                                 |     |       |      |
|---------------------------------|-----|-------|------|
| <b>Total</b>                    | 432 | 2116. | 2548 |
| <b>Frequency Missing = 8546</b> |     |       |      |

| <b>McNemar's Test</b>           |        |
|---------------------------------|--------|
| <b>Statistic (S)</b>            | 4.5873 |
| <b>DF</b>                       | 1      |
| <b>Pr &gt; S</b>                | 0.0322 |
| <b>Simple Kappa Coefficient</b> |        |
| <b>Kappa</b>                    | 0.9337 |
| <b>ASE</b>                      | 0.0082 |
| <b>95% Lower Conf Limit</b>     | 0.9175 |
| <b>95% Upper Conf Limit</b>     | 0.9498 |

| <b>McNemar's Test</b>           |        |
|---------------------------------|--------|
| <b>Statistic (S)</b>            | 2.1892 |
| <b>DF</b>                       | 1      |
| <b>Pr &gt; S</b>                | 0.139  |
| <b>Simple Kappa Coefficient</b> |        |
| <b>Kappa</b>                    | 0.8955 |
| <b>ASE</b>                      | 0.017  |
| <b>95% Lower Conf Limit</b>     | 0.8623 |
| <b>95% Upper Conf Limit</b>     | 0.9288 |

| <b>McNemar's Test</b>           |        |
|---------------------------------|--------|
| <b>Statistic (S)</b>            | 4.8983 |
| <b>DF</b>                       | 1      |
| <b>Pr &gt; S</b>                | 0.0269 |
| <b>Simple Kappa Coefficient</b> |        |
| <b>Kappa</b>                    | 0.8924 |
| <b>ASE</b>                      | 0.0138 |
| <b>95% Lower Conf Limit</b>     | 0.8654 |
| <b>95% Upper Conf Limit</b>     | 0.9195 |

| <b>McNemar's Test</b>           |        |
|---------------------------------|--------|
| <b>Statistic (S)</b>            | 12.6   |
| <b>DF</b>                       | 1      |
| <b>Pr &gt; S</b>                | 0.0004 |
| <b>Simple Kappa Coefficient</b> |        |
| <b>Kappa</b>                    | 0.8617 |
| <b>ASE</b>                      | 0.023  |
| <b>95% Lower Conf Limit</b>     | 0.8166 |
| <b>95% Upper Conf Limit</b>     | 0.9068 |

| <b>McNemar's Test</b> |        |
|-----------------------|--------|
| <b>Statistic (S)</b>  | 1.1628 |

|                                 |        |
|---------------------------------|--------|
| <b>DF</b>                       | 1      |
| <b>Pr &gt; S</b>                | 0.2809 |
| <b>Simple Kappa Coefficient</b> |        |
| <b>Kappa</b>                    | 0.8562 |
| <b>ASE</b>                      | 0.0152 |
| <b>95% Lower Conf Limit</b>     | 0.8265 |
| <b>95% Upper Conf Limit</b>     | 0.8859 |

|                                 |        |
|---------------------------------|--------|
| <b>McNemar's Test</b>           |        |
| <b>Statistic (S)</b>            | 2.6889 |
| <b>DF</b>                       | 1      |
| <b>Pr &gt; S</b>                | 0.1011 |
| <b>Simple Kappa Coefficient</b> |        |
| <b>Kappa</b>                    | 0.8825 |
| <b>ASE</b>                      | 0.0173 |
| <b>95% Lower Conf Limit</b>     | 0.8486 |
| <b>95% Upper Conf Limit</b>     | 0.9163 |

|                                 |        |
|---------------------------------|--------|
| <b>McNemar's Test</b>           |        |
| <b>Statistic (S)</b>            | 0.2308 |
| <b>DF</b>                       | 1      |
| <b>Pr &gt; S</b>                | 0.631  |
| <b>Simple Kappa Coefficient</b> |        |
| <b>Kappa</b>                    | 0.9066 |
| <b>ASE</b>                      | 0.0148 |
| <b>95% Lower Conf Limit</b>     | 0.8776 |
| <b>95% Upper Conf Limit</b>     | 0.9356 |

|                                 |        |
|---------------------------------|--------|
| <b>McNemar's Test</b>           |        |
| <b>Statistic (S)</b>            | 8.8049 |
| <b>DF</b>                       | 1      |
| <b>Pr &gt; S</b>                | 0.003  |
| <b>Simple Kappa Coefficient</b> |        |
| <b>Kappa</b>                    | 0.7776 |
| <b>ASE</b>                      | 0.0166 |
| <b>95% Lower Conf Limit</b>     | 0.7451 |
| <b>95% Upper Conf Limit</b>     | 0.8101 |

|                                 |        |
|---------------------------------|--------|
| <b>McNemar's Test</b>           |        |
| <b>Statistic (S)</b>            | 0.2294 |
| <b>DF</b>                       | 1      |
| <b>Pr &gt; S</b>                | 0.632  |
| <b>Simple Kappa Coefficient</b> |        |

|                             |        |
|-----------------------------|--------|
| <b>Kappa</b>                | 0.8474 |
| <b>ASE</b>                  | 0.0142 |
| <b>95% Lower Conf Limit</b> | 0.8195 |
| <b>95% Upper Conf Limit</b> | 0.8753 |
